# Supplementary material for: eIF2α-mediated integrated stress response links multiple intracellular signaling pathways to reprogram vascular smooth muscle cell fate in carotid artery plaque
Source: PubMed Central journal article supplement — Heliyon. 2024 Feb 23;10(5):e26904. doi: 10.1016/j.heliyon.2024.e26904 (PMC10907769; doi:10.1016/j.heliyon.2024.e26904), 2024-02-23

HA-VSMC

Ctrl DTT HG ox-LDL

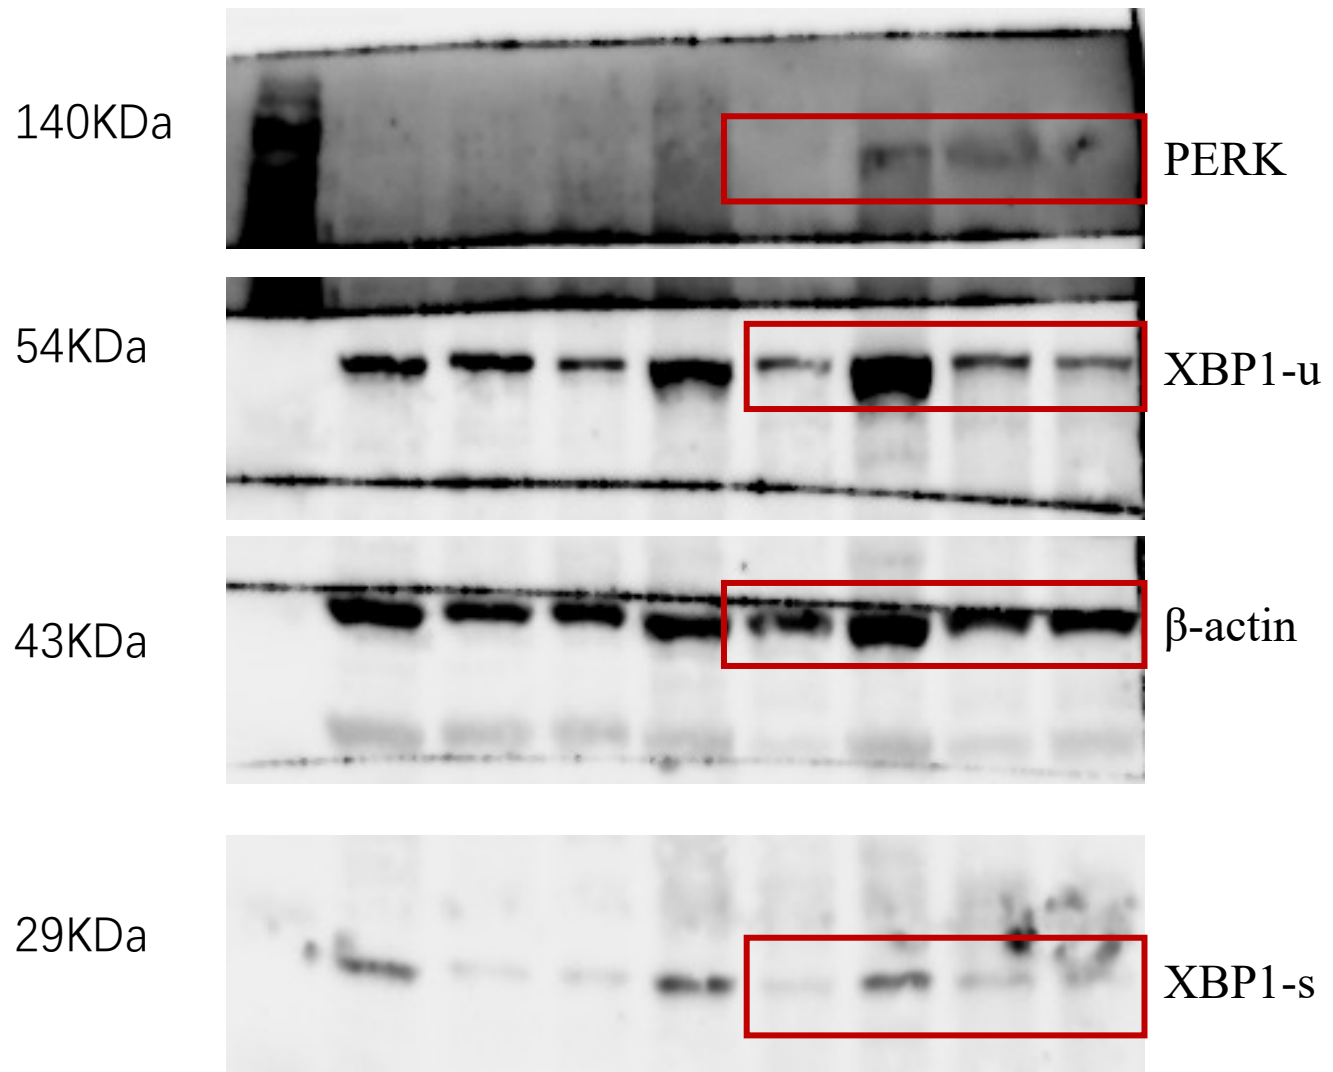

HC-VSMC

Ctrl DTT HG ox-LDL

140KDa

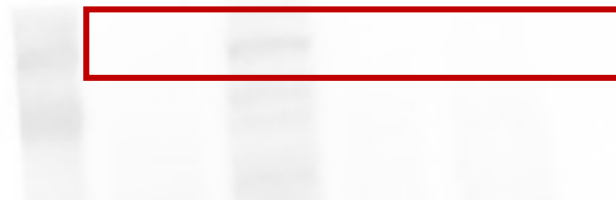

PERK

54KDa

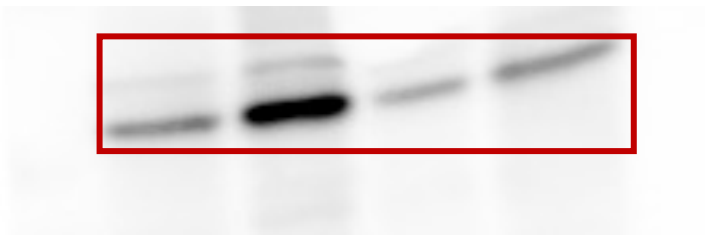

XBP1-u

43KDa

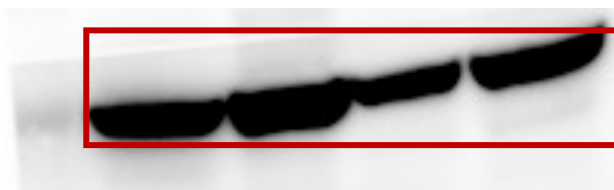

$\beta$ -actin

29KDa

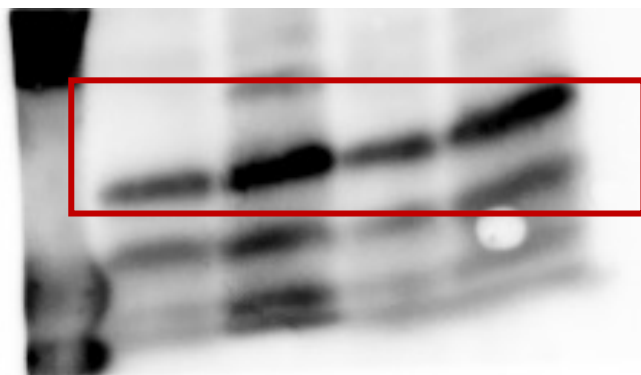

XBP1-s

HA-VSMC

Ctrl BafA1 HG ox-LDL

43KDa

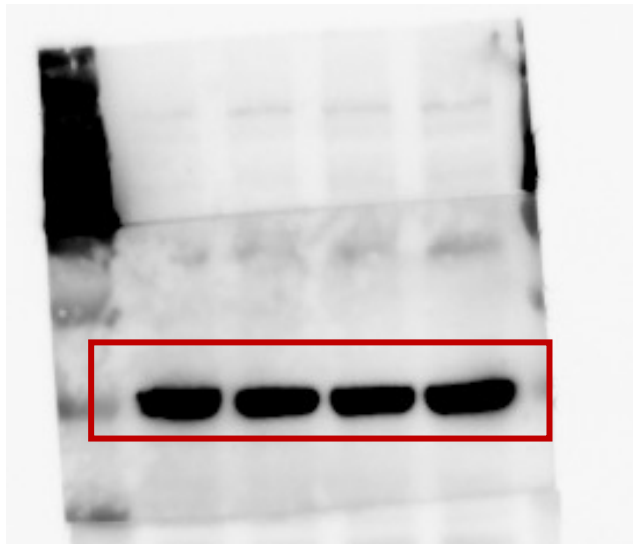

$\beta$ -actin

HA-VSMC

Ctrl BafA1 HG ox-LDL

110KDa

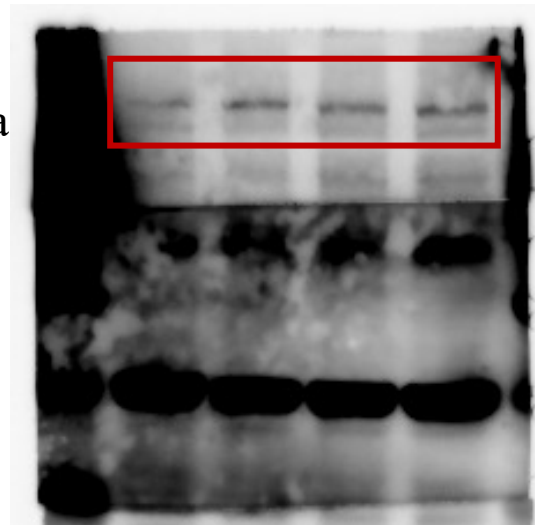

LAMP1

14KDa

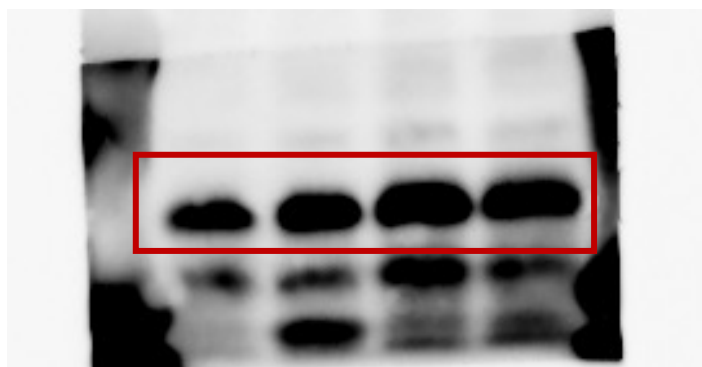

LC-II

16KDa

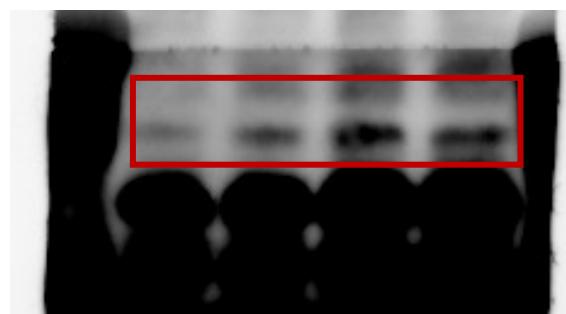

LC-I

HC-VSMC

Ctrl BafA1 HG ox-LDL

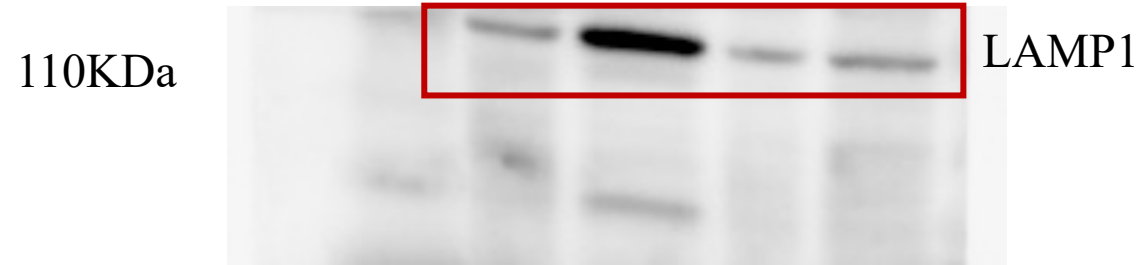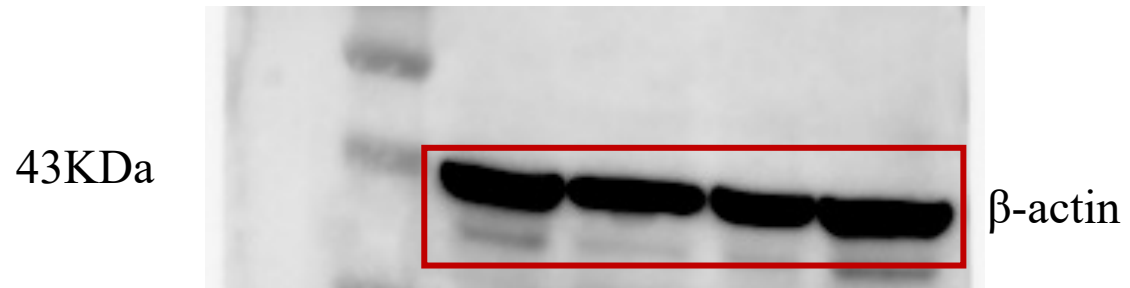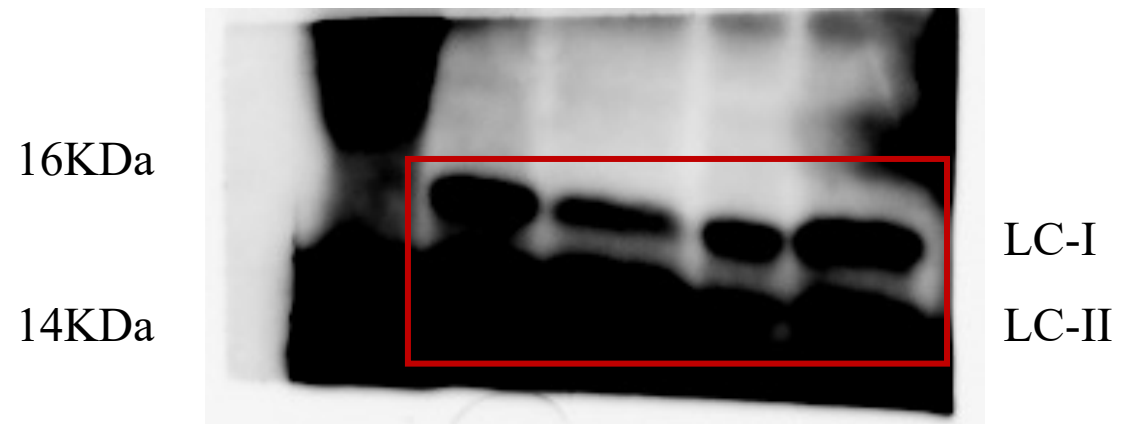

HA-VSMC

Ctrl CCCP HG ox-LDL

78KDa

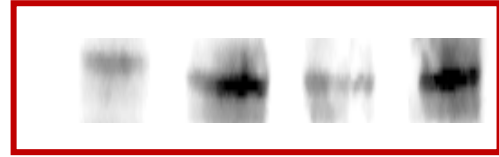

P-DRP1  
(S616)

78KDa

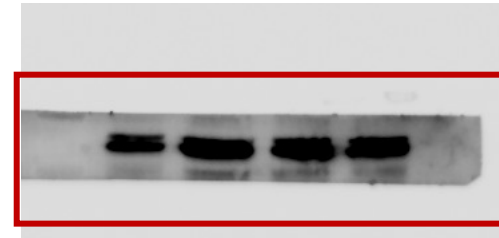

DRP1

54KDa

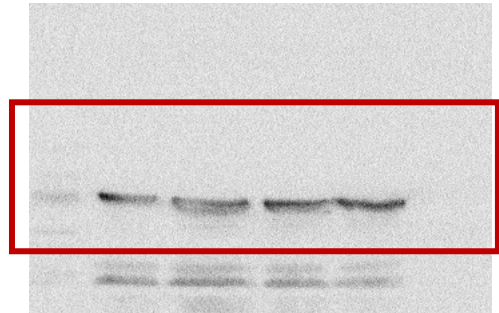

$\beta$ -actin

16KDa

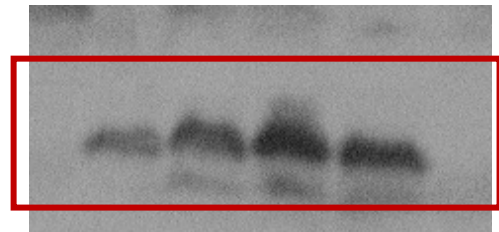

Tom 20

HA-VSMC

Ctrl CCCP HG ox-LDL

78KDa

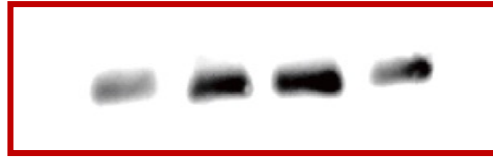

P-DRP1  
(S616)

78KDa

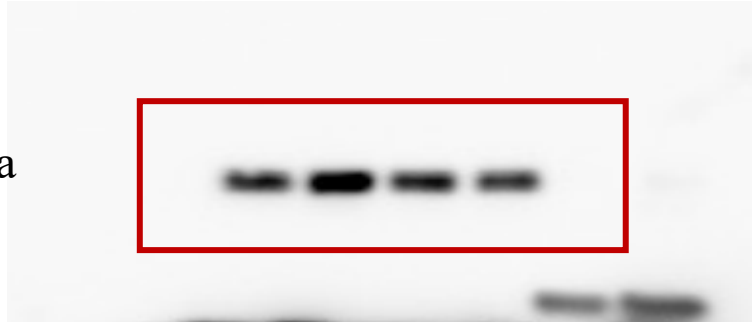

DRP1

54KDa

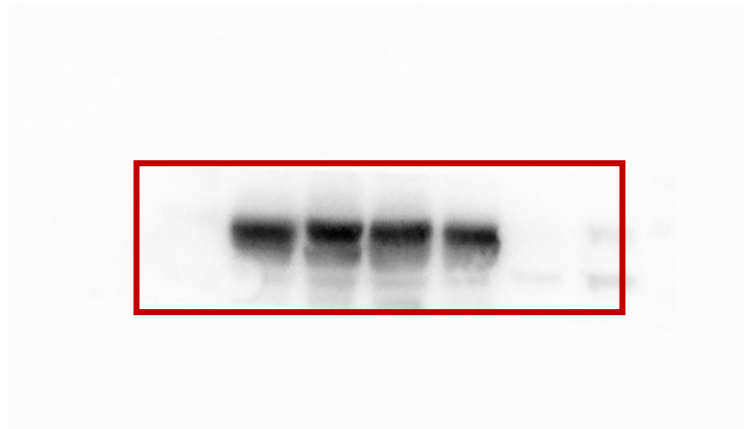

$\beta$ -actin

16KDa

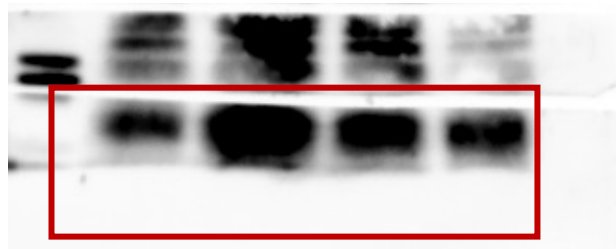

Tom 20

Ctrl. Oligo DTT DTT+Oligo

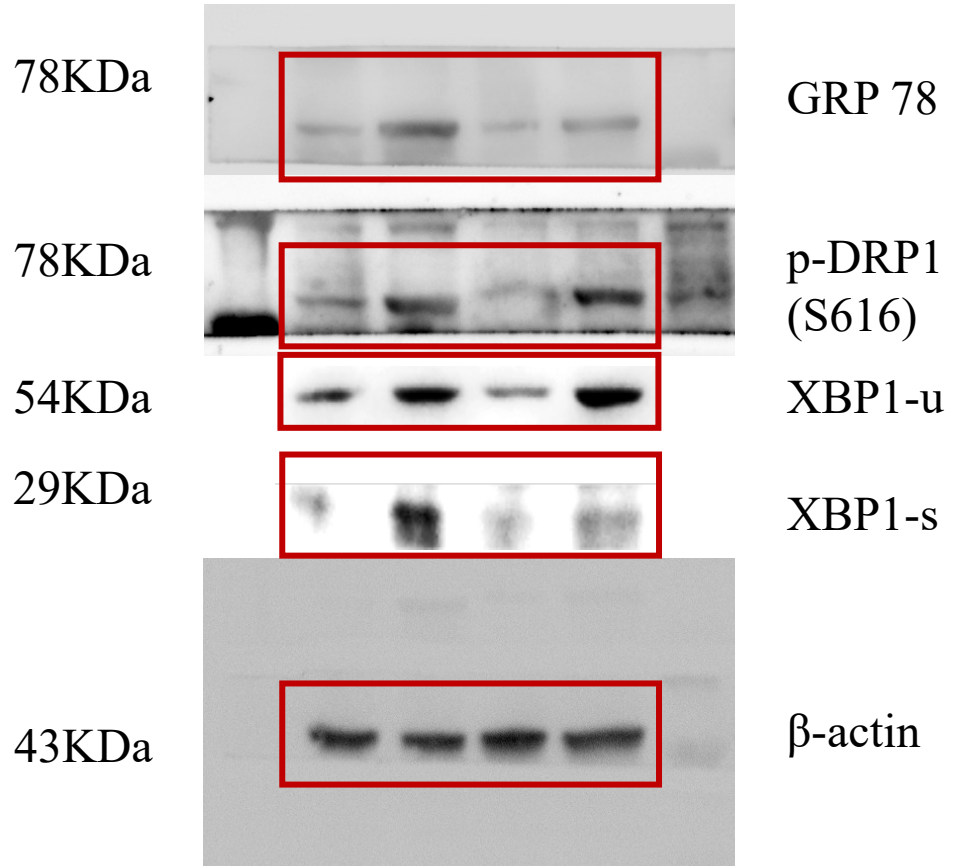

Ctrl. Oligo DTT DTT+Oligo

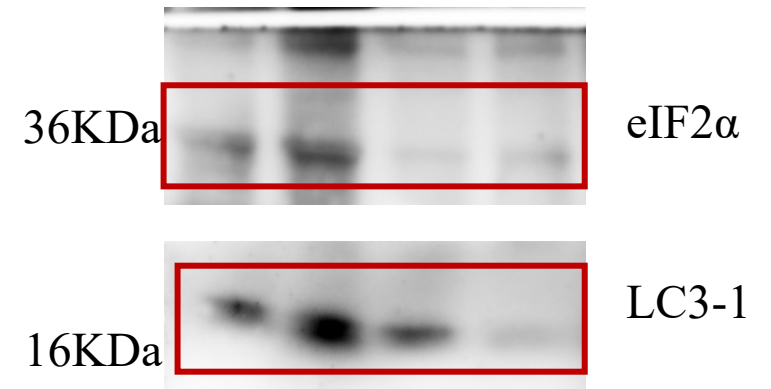

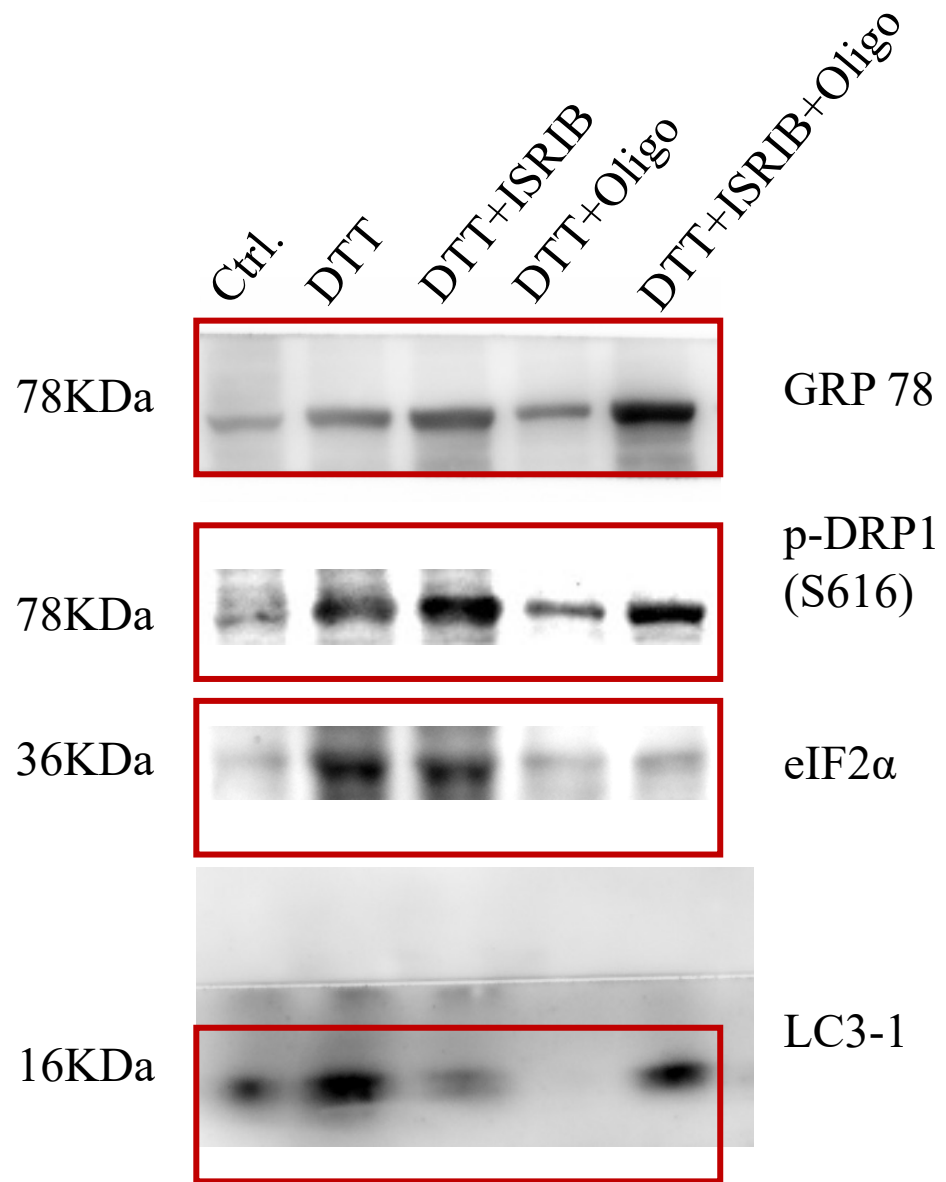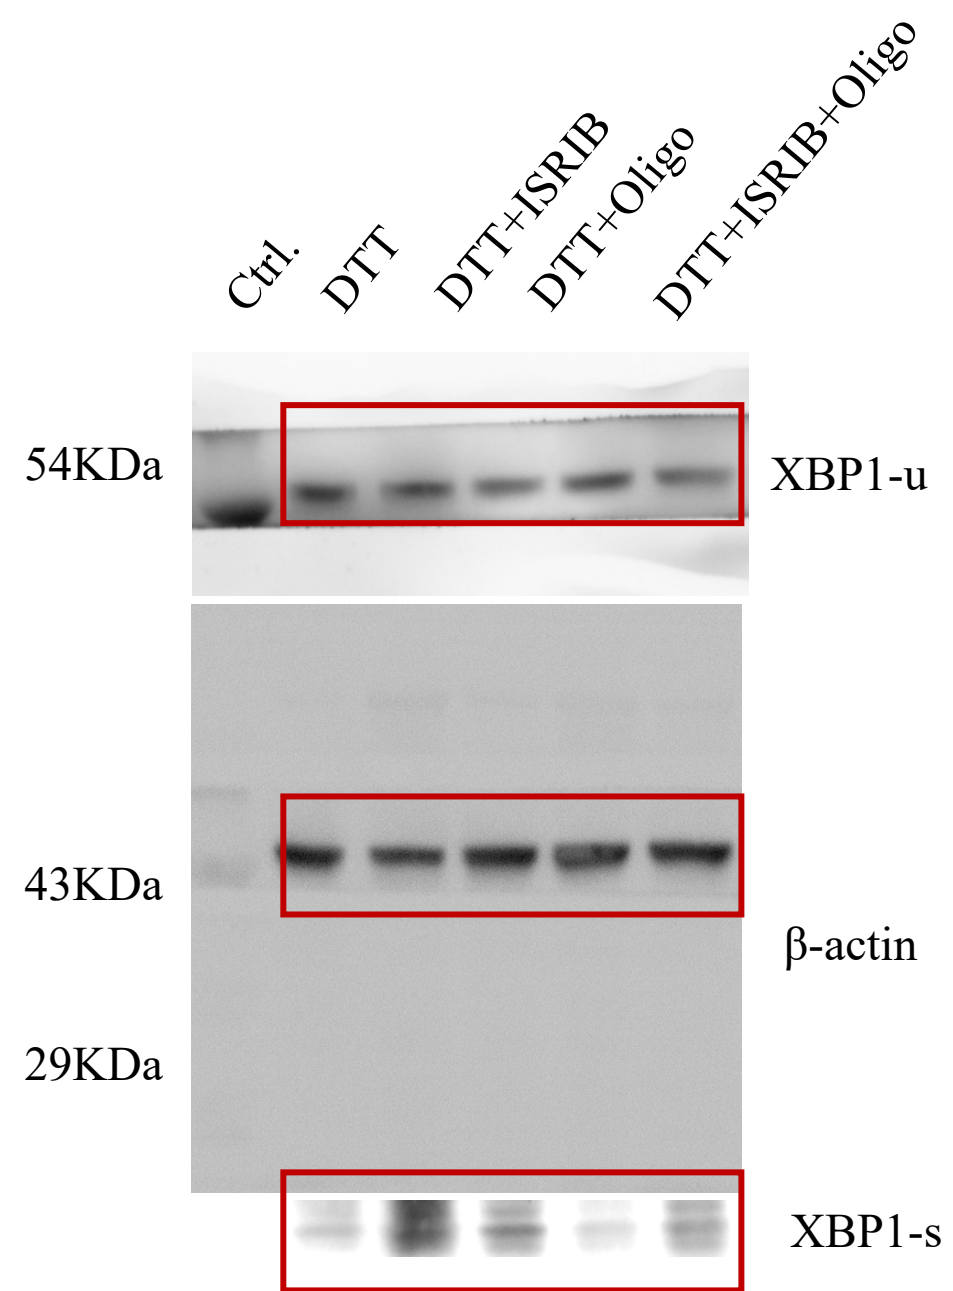

Supplement: mmc3.pdf [file mmc3.pdf]
