# Supplementary material for: eIF2α-mediated integrated stress response links multiple intracellular signaling pathways to reprogram vascular smooth muscle cell fate in carotid artery plaque
Source: PubMed Central journal article supplement — Heliyon. 2024 Feb 23;10(5):e26904. doi: 10.1016/j.heliyon.2024.e26904 (PMC10907769; doi:10.1016/j.heliyon.2024.e26904), 2024-02-23
Supplement: mmc2.pdf [file mmc2.pdf]

**Supplementary Table 1** Clinical characteristics of patients with carotid stenosis for the culture of primary VSMCs

| Characteristic                 | Stable plaque group | Vulnerable plaque group | P value           |
|--------------------------------|---------------------|-------------------------|-------------------|
| No.                            | 15                  | 15                      |                   |
| Male, No. (%)                  | 13(92.9%)           | 15(93.8%)               | 1.00              |
| Age, mean $\pm$ SD, y          | 62.5 $\pm$ 7.5      | 63.6 $\pm$ 7.7          | 0.69              |
| Hypertension                   | 9(64.3%)            | 13(81.3%)               | 0.42              |
| Diabetes mellitus              | 5(35.7%)            | 11(68.8%)               | 0.14              |
| Hyperlipidemia                 | 6(42.9%)            | 10(62.5%)               | 0.46              |
| CAD                            | 1(7.1%)             | 4(25.0%)                | 0.34              |
| Smoking history                | 4(28.6%)            | 8(50%)                  | 0.28              |
| HDL-C(mmol/L)                  | 0.9 $\pm$ 0.2       | 0.9 $\pm$ 0.2           | 0.98              |
| LDL-C(mmol/L)                  | 1.4 $\pm$ 0.4       | 1.9 $\pm$ 0.5           | <b>0.03</b>       |
| Triglyceride(mmol/L)           | 0.8 $\pm$ 0.3       | 1.3 $\pm$ 0.6           | <b>0.01</b>       |
| Total cholesterol (mmol/L)     | 2.9 $\pm$ 0.7       | 3.0 $\pm$ 0.5           | 0.51              |
| Apoprotein A1 (g/L)            | 1.0 $\pm$ 0.2       | 1.0 $\pm$ 0.2           | 0.83              |
| Apoprotein B (g/L)             | 0.6 $\pm$ 0.2       | 0.6 $\pm$ 0.1           | 0.56              |
| Fasting blood glucose (mmol/L) | 4.8 $\pm$ 1.3       | 8.6 $\pm$ 1.9           | <b>&lt;0.0001</b> |
| Glycated hemoglobin (%)        | 5.4 $\pm$ 0.8       | 6.9 $\pm$ 1.1           | <b>&lt;0.0001</b> |
| High-sensitive CRP (mg/L)      | 1.4 $\pm$ 0.8       | 1.5 $\pm$ 1.8           | 0.76              |

BMI body mass index (calculated as weight in kilograms divided by height in meters squared), CAD coronary artery disease, LDL-C low-density lipoprotein cholesterol, HDL-C high-density lipoprotein cholesterol
